# Supplementary material for: Horses’ (Equus Caballus) Laterality, Stress Hormones, and Task Related Behavior in Innovative Problem-Solving
Source: MDPI journal article supplement (doi:10.3390/ani9050265), 2019-05-22
Supplement: s1 [file s1]

1 Supplementary Material

## 2 **The horses' (*Equus caballus*) laterality, stress hormones and task**

### 3 **related behavior in innovative problem-solving**

4 **Laureen Esch <sup>1,2,\*</sup>, Caroline Wöhr <sup>1</sup>, Michael Erhard <sup>1</sup>, Konstanze Krüger <sup>2,3</sup>**

5 1 Ludwig Maximilian University Munich, Veterinarian Medicine, Department of animal welfare, ethology,  
6 animal hygiene and animal husbandry, Veterinaerstr. 13/R, 80539 Munich, Germany

7 2 Nuertingen-Geislingen University, Faculty Agriculture, Economics and Management, Department  
8 Equine Economics, Neckarsteige 6-10, 72622 Nuertingen, Germany

9 3 University of Regensburg, Zoology / Evolutionary Biology, Universitaetsstraße 31, 93053 Regensburg,  
10 Germany

11 \* Correspondence: laureen.esch@gmx.de; Tel.: 0049 8456 9186099

12  
13 **Figure S1.** Overview of the experimental area, the horse's box, type B. The horses were tested  
14 in their own boxes. The boxes were closed on four sides and were made of wood up to a height of  
15 130 cm and of lattice bars up to the height of 233 cm.

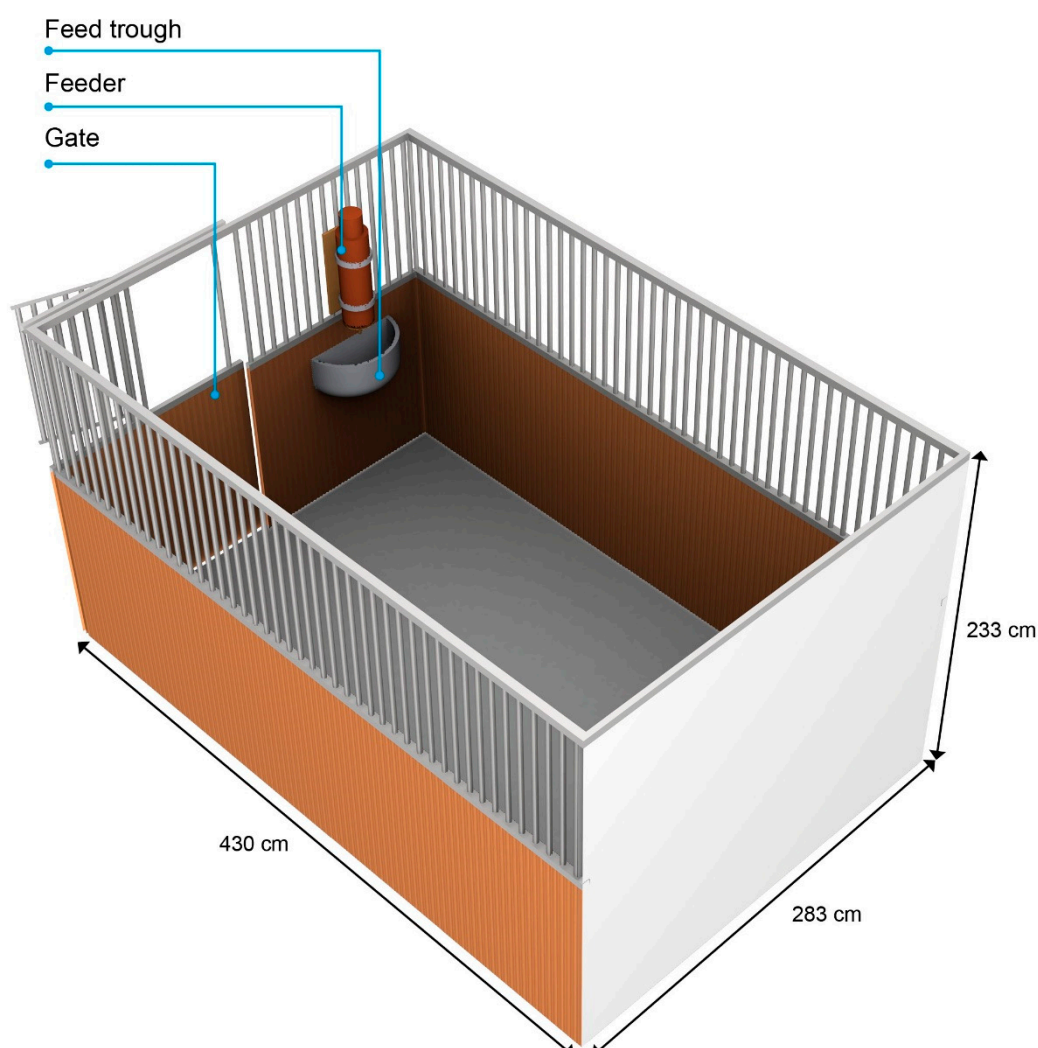

17 **Figure S2.** Inside the test area, the horses' box, type B. The feeder was installed above the feeding  
18 trough. The feeding troughs were either on the left or the right side of the box and the entrance to the  
19 box was on the opposite side from the feeding trough.

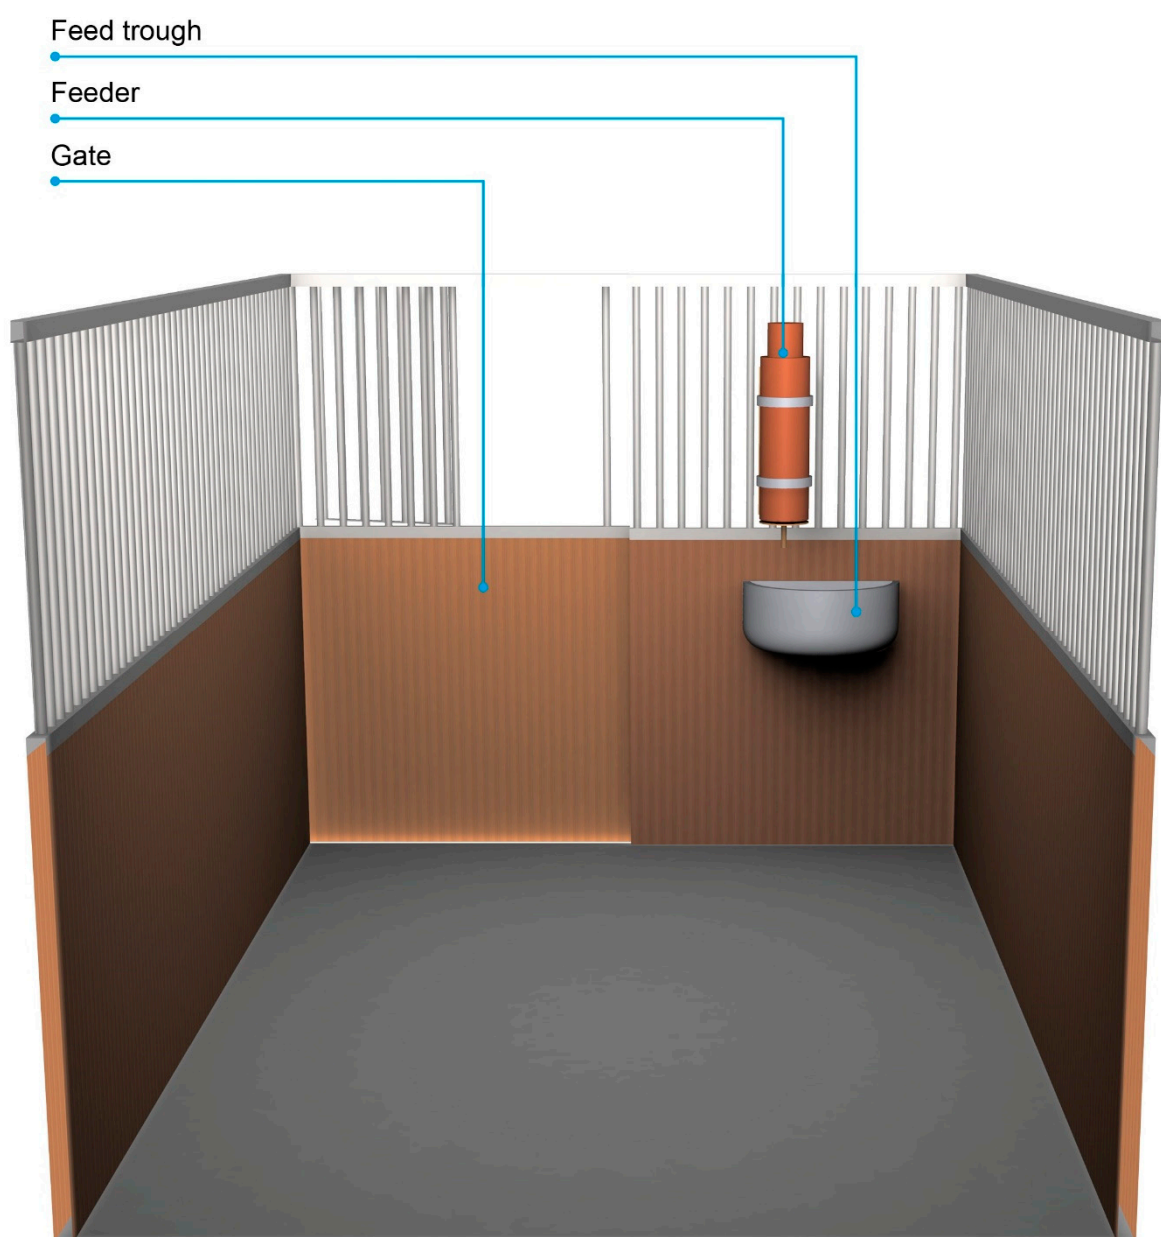

20  
21  
22

**Figure S3.** Construction of the feeder. The feeder was similar to a casing tube with a pendulum. When a horse moved the rod with the muzzle, a crossbar was rotated inside the feeder, and small quantities of feed trickled onto the collection plate, and with further rotation of the rod the feed fell from the collection plate in the feeding trough.

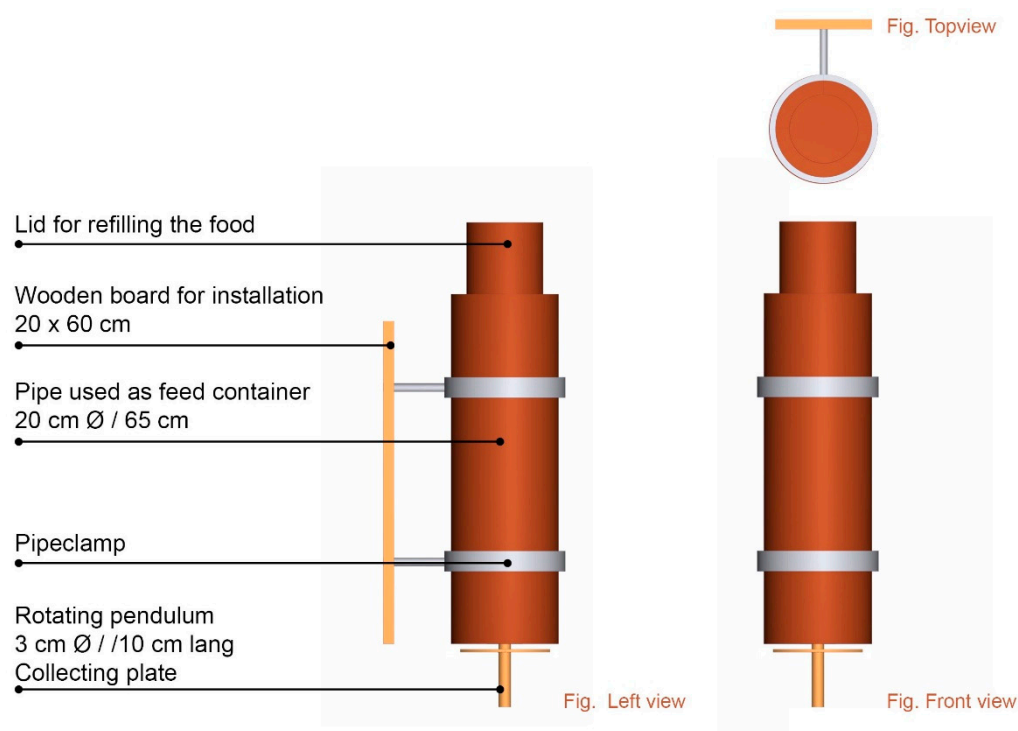

**Figure S4.** Criteria for evaluating the horses' sensory laterality. An approach of the horse to the feeder was counted when a contact with the feeder followed the approach. A lateral approach was counted when the horse twisted its head or body more than 10° to the left or to the right to approach and contact the feeder

**Figure S5.** Horse lateral approach with a) the left eye, b) the right eye or c) in a neutral position. The sensory laterality of the horses was analyzed from the video recordings by noting the side of the head the horse turned towards the novel feeder for their first approach, when contacting the feeder.

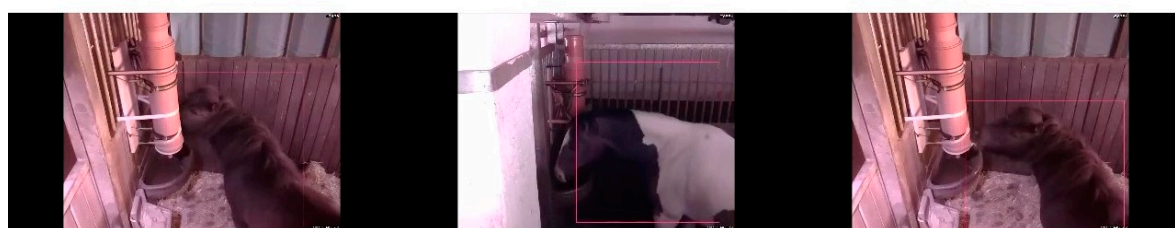

**Table S1.** Horse motor laterality data. The motor laterality of the test horses was analysed while they were grazing on the pasture in the weeks before the experiment was started. The front leg that was placed forward was recorded every ten seconds until we had 200 recordings. These observations were distributed over three consecutive days for each horse. A sensory and motor laterality index (Austin rogers 2012, 2014) was calculated for each horse by applying the formula  $LI = (R - L) / (R + L)$ . Where L stands for number of left scores and R for the number of right scores. The index assigns a value between -1 and 1, in which the range -1 to less than 0 stands for a preference for the left sensory organs or legs, while a result between greater than 0 and +1 indicates a preference for the right ones and a result equal to 0 means an ambilateral use of the right and left side. The absolute value of the laterality index ( $|LI|$ ) is a measurement of the strength of lateral bias irrespective of the direction of the bias. To determine whether a preference of an individual horse was significant Z scores  $(L - (L + R)/2) / \sqrt{((L + R)/4)}$  were calculated. A z-score  $\geq 1.96$  or  $\leq -1.96$  indicates a lateral bias, a value between these two scores indicates no lateral bias (ambilateral). Values of % left bias, calculated as  $L/(L + R) \times 100$ , are also stated as a

descriptive statistic to give an indication of the degree of bias but these were not used in any of the calculations.

We categorized the horses to the following groups: innovative problem-solvers (ips), by chance problem-solvers (cps) and non-problem-solvers (nps).

| Horse   | group |      |       | index | % left bias | z-score | laterality  |  |
|---------|-------|------|-------|-------|-------------|---------|-------------|--|
|         |       | left | right |       |             |         | group       |  |
| Jana    | cps   | 137  | 63    | -0,37 | 68,50       | 5,23    | left        |  |
| Mirella | nps   | 197  | 3     | -0,97 | 98,50       | 13,72   | left        |  |
| Kalinka | ips   | 146  | 54    | -0,46 | 73,00       | 6,51    | left        |  |
| Floh    | nps   | 94   | 106   | 0,06  | 47,00       | -0,85   | ambilateral |  |
| Melody  | nps   | 78   | 112   | 0,18  | 41,05       | -2,47   | right       |  |
| Filou   | nps   | 94   | 106   | 0,06  | 47,00       | -0,85   | ambilateral |  |
| Tessa   | nps   | 173  | 27    | -0,73 | 86,50       | 10,32   | left        |  |
| Rimma   | cps   | 121  | 79    | -0,21 | 60,50       | 2,97    | left        |  |
| Sam     | cps   | 89   | 111   | 0,11  | 44,50       | -1,56   | ambilateral |  |
| Szölo   | cps   | 184  | 16    | -0,84 | 92,00       | 11,88   | left        |  |
| Filly   | nps   | 6    | 194   | 0,94  | 3,00        | -13,29  | right       |  |
| Eloisa  | ips   | 182  | 18    | -0,82 | 91,00       | 11,60   | left        |  |
| Rio     | cps   | 91   | 109   | 0,09  | 54,50       | -1,27   | ambilateral |  |
| Casuro  | cps   | 184  | 16    | -0,84 | 92,00       | 11,88   | left        |  |
| River   | ips   | 179  | 21    | -0,79 | 89,50       | 11,17   | left        |  |
| Quiso   | ips   | 136  | 64    | -0,36 | 68,00       | 5,09    | left        |  |

**Table S2.** Horse sensory laterality data. A new approach and contact were counted when the interaction with the feeder was interrupted for more than ten seconds. Sensory laterality was determined on the basis of the number of occurrences within the time period of the test. A sensory and motor laterality index was calculated for each horse by applying the formula  $LI = (R - L) / (R + L)$ . Where L stands for number of left scores and R for the number of right scores. The index assigns a value between -1 and 1, in which the range -1 to less than 0 stands for a preference for the left sensory organs or legs, while a result between greater than 0 and +1 indicates a preference for the right ones and a result equal to 0 means an ambilateral use of the right and left side. The absolute value of the laterality index ( $|LI|$ ) is a measurement of the strength of lateral bias irrespective of the direction of the bias. To determine whether a preference of an individual horse was significant Z scores  $(L - (L + R/2)) / \sqrt{((L + R)/4)}$  were calculated. A z-score  $\geq 1.96$  or  $\leq -1.96$  indicates a lateral bias, a value between these two scores indicates no lateral bias (ambilateral). Values of % left bias, calculated as  $L/(L + R) \times 100$ , are also stated as a descriptive statistic to give an indication of the degree of bias but

these were not used in any of the calculations. We categorized the horses to the following groups: innovative problem-solvers (ips), by chance problem-solvers (cps) and non-problem-solvers (nps).

| Horse   | group | left | right | index | % left bias | z-score | laterality group |
|---------|-------|------|-------|-------|-------------|---------|------------------|
| Jana    | cps   | 15   | 44    | 0,49  | 25,42       | -3,78   | right            |
| Mirella | nps   | 16   | 26    | 0,24  | 38,10       | -1,54   | ambilateral      |
| Kalinka | ips   | 66   | 6     | -0,83 | 91,67       | 7,07    | left             |
| Melody  | nps   | 5    | 9     | 0,29  | 35,71       | -1,07   | ambilateral      |
| Floh    | nps   | 78   | 135   | 0,27  | 36,62       | -3,91   | right            |
| Filou   | nps   | 18   | 1     | -0,89 | 94,74       | 3,90    | left             |
| Tessa   | nps   | 8    | 7     | -0,07 | 53,33       | 0,26    | ambilateral      |
| Rimma   | cps   | 10   | 6     | -0,25 | 62,50       | 1,00    | ambilateral      |
| Sam     | cps   | 20   | 5     | -0,60 | 80,00       | 3,00    | left             |
| Szölo   | cps   | 22   | 10    | -0,38 | 68,75       | 2,12    | left             |
| Filly   | nps   | 17   | 10    | -0,26 | 62,96       | 1,35    | ambilateral      |
| Eloisa  | ips   | 6    | 5     | -0,10 | 54,55       | 0,30    | ambilateral      |
| Rio     | cps   | 14   | 2     | -0,75 | 87,50       | 3,00    | left             |
| River   | ips   | 65   | 12    | -0,69 | 84,42       | 6,04    | left             |
| Casuro  | cps   | 19   | 12    | -0,23 | 61,29       | 1,26    | ambilateral      |
| Quiso   | ips   | 59   | 20    | -0,50 | 74,68       | 4,39    | left             |

**File S2.** Complete and reduced generalized linear mixed models (GLMMs). We applied generalized linear mixed models for considering random and fixed effects on the dependent variable 'amount of food consumed', as a measurement for whether horses were innovative in a few trials. The model was set at family 'gaussian', the ID of the horses considered as random factor and the specific factors age, sex, size, motor and sensory laterality, basal and test value of the glucocorticoid metabolites, activity, latency, persistency, food motivation and tenacity as fixed factors.

**Consumption:** amount of consumed feed from the feeder; given in gram

**Activity:** sum of the duration of the video sequences is equal to the sum of the horses' being in motion, e.g. active; time is given in minutes

**Age:** given in years

**B.ng.g:** basal value (mean of 3 consecutive days) of the glucocorticoid metabolites in ng/g

**Food motivation:** time needed to consume the feed in the pretrial, time is given in minutes

**Latency:** time duration until first contact is the latency, time is given in minutes

**Motor laterality:** laterality index

**Persistency:** number of each test horse's contact with the feeder is the persistency

**Sensory laterality:** laterality index

**Through position:** Type B = right (1) or Type A = left (2)

**Sex:** mare (1) or gelding (2)

**Size:** measured at wither's height, given in meters

**T.ng.g:** test value of the glucocorticoid metabolites in ng/g

**Tenacity:** time spent with the feeder in relation to the agility, given as a percentage

#### Including all factors

call:

```
glm(formula = consumption ~ (activity + age + B.ng.g + food.motivation + latency
+ motor.laterality + persistency + (sensory.laterality/through.position) + sex +
size + T.ng.g + tenacity)/ID, family = gaussian(identity),data = Dataset)
```

Deviance Residuals:

|          |          |          |          |         |        |         |         |
|----------|----------|----------|----------|---------|--------|---------|---------|
| 1        | 2        | 3        | 4        | 5       | 6      | 7       | 8       |
| 86.145   | -151.377 | 1.265    | 58.570   | -27.156 | 33.607 | 192.137 | 86.371  |
| 9        | 10       | 11       | 12       | 13      | 14     | 15      | 16      |
| -197.804 | -5.734   | -112.043 | -161.069 | 130.767 | 7.362  | -80.303 | 139.262 |

Coefficients:

|                    | Estimate   |
|--------------------|------------|
| (Intercept)        | 3.445e+02  |
| activity           | 3.003e+00  |
| age                | 4.314e+01  |
| B.ng.g             | 2.165e+00  |
| food.motivation    | -1.352e+02 |
| latency            | 5.935e+00  |
| motor.laterality   | -5.550e+02 |
| persistency        | -6.661e+00 |
| sensory.laterality | -2.455e+03 |
| sex                | -3.413e+02 |
| size               | -2.628e+03 |
| T.ng.g             | 8.679e-01  |

|     |                                                                                   |            |
|-----|-----------------------------------------------------------------------------------|------------|
| 162 | tenacity                                                                          | 1.243e+02  |
| 163 | sensory.laterality:through.position                                               | 1.870e+03  |
| 164 | activity:age:B.ng.g:food.motivation:latency:motor.laterality:persistency:sensory. |            |
| 165 | laterality:through.position:sex:size:T.ng.g:tenacity:ID                           | -1.392e-13 |
| 166 |                                                                                   |            |
| 167 |                                                                                   | Std. Error |
| 168 | (Intercept)                                                                       | 7.135e+03  |
| 169 | activity                                                                          | 2.730e+00  |
| 170 | age                                                                               | 1.533e+02  |
| 171 | B.ng.g                                                                            | 1.214e+01  |
| 172 | food.motivation                                                                   | 1.418e+03  |
| 173 | latency                                                                           | 3.125e+00  |
| 174 | motor.laterality                                                                  | 8.272e+02  |
| 175 | persistency                                                                       | 7.686e+00  |
| 176 | sensory.laterality                                                                | 4.931e+03  |
| 177 | sex                                                                               | 1.638e+03  |
| 178 | size                                                                              | 6.094e+03  |
| 179 | T.ng.g                                                                            | 4.866e+00  |
| 180 | tenacity                                                                          | 6.230e+01  |
| 181 | sensory.laterality:through.position                                               | 3.845e+03  |
| 182 | activity:age:B.ng.g:food.motivation:latency:motor.laterality:persistency:sensory. |            |
| 183 | laterality:through.position:sex:size:T.ng.g:tenacity:ID                           | 1.970e-13  |
| 184 |                                                                                   |            |
| 185 |                                                                                   | t value    |
| 186 | (Intercept)                                                                       | 0.048      |
| 187 | activity                                                                          | 1.100      |
| 188 | age                                                                               | 0.281      |
| 189 | B.ng.g                                                                            | 0.178      |
| 190 | food.motivation                                                                   | -0.095     |
| 191 | latency                                                                           | 1.899      |
| 192 | motor.laterality                                                                  | -0.671     |
| 193 | persistency                                                                       | -0.867     |
| 194 | sensory.laterality                                                                | -0.498     |
| 195 | sex                                                                               | -0.208     |
| 196 | size                                                                              | -0.431     |
| 197 | T.ng.g                                                                            | 0.178      |
| 198 | tenacity                                                                          | 1.996      |
| 199 | sensory.laterality:through.position                                               | 0.486      |
| 200 | activity:age:B.ng.g:food.motivation:latency:motor.laterality:persistency:sensory. |            |
| 201 | laterality:through.position:sex:size:T.ng.g:tenacity:ID                           | -0.707     |
| 202 |                                                                                   |            |
| 203 |                                                                                   | Pr(> t )   |
| 204 | (Intercept)                                                                       | 0.969      |
| 205 | activity                                                                          | 0.470      |

```

206 age 0.825
207 B.ng.g 0.888
208 food.motivation 0.939
209 latency 0.309
210 motor.laterality 0.624
211 persistency 0.545
212 sensory.laterality 0.706
213 sex 0.869
214 size 0.741
215 T.ng.g 0.888
216 tenacity 0.296
217 sensory.laterality:through.position 0.712
218 activity:age:B.ng.g:food.motivation:latency:motor.laterality:persistency:sensory.
219 laterality:through.position:sex:size:T.ng.g:tenacity:ID 0.608
220
221 (Dispersion parameter for gaussian family taken to be 200664.3)
222 Null deviance: 24443000 on 15 degrees of freedom
223 Residual deviance: 200664 on 1 degrees of freedom
224 AIC: 228.39
225
226 Number of Fisher Scoring iterations: 2
227
228 After stepwise removal of factors:
229 call:
230 glm(formula = consumption ~ (activity + B.ng.g + food.motivation +
231 latency + motor.laterality + persistency + (sensory.laterality/through.positi
232 on) +
233 sex + size + tenacity)/ID, family = gaussian(identity), data = Dataset)
234
235 Deviance Residuals:
236 1 2 3 4 5 6 7 8
237 85.680 -163.420 -12.157 38.217 -15.463 13.607 137.214 136.568
238 9 10 11 12 13 14 15 16
239 -195.507 6.973 -87.439 -134.663 109.683 12.632 -27.953 96.028
240
241 Coefficients:
242
243 Estimate
244 (Intercept) -1.842e+03
245 activity 2.575e+00
246 B.ng.g 4.435e+00
247 food.motivation 3.121e+02
248 latency 5.292e+00
249 motor.laterality -4.819e+02

```

|     |                                                                                   |            |
|-----|-----------------------------------------------------------------------------------|------------|
| 250 | persistence                                                                       | -5.817e+00 |
| 251 | sensory.laterality                                                                | -1.346e+03 |
| 252 | sex                                                                               | -8.359e+02 |
| 253 | size                                                                              | -8.364e+02 |
| 254 | tenacity                                                                          | 1.099e+02  |
| 255 | sensory.laterality:through.position                                               | 8.907e+02  |
| 256 | activity:B.ng.g:food.motivation:latency:motor.laterality:persistence:sensory.late |            |
| 257 | rality:through.position:sex:size:tenacity:ID                                      | -9.967e-10 |
| 258 |                                                                                   |            |
| 259 |                                                                                   | Std. Error |
| 260 | (Intercept)                                                                       | 1.186e+03  |
| 261 | activity                                                                          | 6.692e-01  |
| 262 | B.ng.g                                                                            | 1.845e+00  |
| 263 | food.motivation                                                                   | 2.027e+02  |
| 264 | latency                                                                           | 7.412e-01  |
| 265 | motor.laterality                                                                  | 2.336e+02  |
| 266 | persistence                                                                       | 3.368e+00  |
| 267 | sensory.laterality                                                                | 5.941e+02  |
| 268 | sex                                                                               | 2.976e+02  |
| 269 | size                                                                              | 8.018e+02  |
| 270 | tenacity                                                                          | 1.425e+01  |
| 271 | sensory.laterality:through.position                                               | 3.610e+02  |
| 272 | activity:B.ng.g:food.motivation:latency:motor.laterality:persistence:sensory.late |            |
| 273 | rality:through.position:sex:size:tenacity:ID                                      | 2.675e-10  |
| 274 |                                                                                   |            |
| 275 |                                                                                   | t value    |
| 276 | (Intercept)                                                                       | -1.554     |
| 277 | activity                                                                          | 3.847      |
| 278 | B.ng.g                                                                            | 2.404      |
| 279 | food.motivation                                                                   | 1.539      |
| 280 | latency                                                                           | 7.141      |
| 281 | motor.laterality                                                                  | -2.063     |
| 282 | persistence                                                                       | -1.727     |
| 283 | sensory.laterality                                                                | -2.265     |
| 284 | sex                                                                               | -2.809     |
| 285 | size                                                                              | -1.043     |
| 286 | tenacity                                                                          | 7.714      |
| 287 | sensory.laterality:through.position                                               | 2.467      |
| 288 | activity:B.ng.g:food.motivation:latency:motor.laterality:persistence:sensory.late |            |
| 289 | rality:through.position:sex:size:tenacity:ID                                      | -3.726     |
| 290 |                                                                                   |            |
| 291 |                                                                                   | Pr(> t )   |
| 292 | (Intercept)                                                                       | 0.21808    |
| 293 | activity                                                                          | 0.03099*   |

```

294 B.ng.g 0.09556'
295 food.motivation 0.22139
296 latency 0.00565**
297 motor.laterality 0.13115
298 persistency 0.18261
299 sensory.laterality 0.10841
300 sex 0.06734'
301 size 0.37355
302 tenacity 0.00453**
303 sensory.laterality:through.position 0.09027'
304 activity:B.ng.g:food.motivation:latency:motor.laterality:persistency:sensory.late
305 rality:through.position:sex:size:tenacity:ID 0.03368*
306
307 signif. codes: 0 '***' 0.001 '**' 0.01 '*' 0.05 '.' 0.1 ' ' 1
308
309 (Dispersion parameter for gaussian family taken to be 53267.29)
310 Null deviance: 24443000 on 15 degrees of freedom
311 Residual deviance: 159802 on 3 degrees of freedom
312 AIC: 220.75
313
314 Number of Fisher Scoring iterations: 2
315

```
